# Supplementary material for: Biomass porous carbon as the active site to enhance photodegradation of oxytetracycline on mesoporous g-C3N4
Source: Royal Society of Chemistry journal article supplement (doi:10.1039/d1ra08615d), 2022-01-01
Supplement: d1ra08615d1.pdf [file d1ra08615d1.pdf]

## Supplementary data

### Biomass porous carbon loaded on graphitic carbon nitride composites by molten salt assisted thermal polycondensation for effective oxytetracycline removing

Hekun Ding <sup>a,b</sup>, Zheng Liu <sup>\* a,b</sup>, Qiongyue Zhang <sup>a</sup>, Xiao He <sup>a,b</sup>, Qingge Feng <sup>b</sup>,

Dongbo Wang <sup>b</sup> and Dachao Ma <sup>b</sup>

<sup>a</sup>Guangxi Key Laboratory of Petrochemical Resource Processing and Process Intensification Technology, Guangxi University, Nanning 530004, Guangxi, China.

<sup>b</sup>School of Resources, Environment and Materials, Guangxi University, Nanning 530004, Guangxi, China.

\* Corresponding author, Email Address: [zhengl99@gxu.edu.cn](mailto:zhengl99@gxu.edu.cn) (Zheng Liu)

Table S1: Pseudo-first-order and pseudo-second order kinetics parameters for OTC adsorption with g-C<sub>3</sub>N<sub>4</sub> and BPC(X%)/g-C<sub>3</sub>N<sub>4</sub>

| Material                                 | Model fitting parameters |                |                           |                |
|------------------------------------------|--------------------------|----------------|---------------------------|----------------|
|                                          | Pseudo-first-order       |                | Pseudo-second order       |                |
|                                          | K <sub>1</sub> (1/min)   | R <sup>2</sup> | K <sub>2</sub> (g/mg·min) | R <sup>2</sup> |
| g-C <sub>3</sub> N <sub>4</sub>          | -0.02055                 | 0.78432        | 0.54352                   | 0.97876        |
| BPC(1%)/g-C <sub>3</sub> N <sub>4</sub>  | -0.09696                 | 0.93549        | 0.87431                   | 0.99493        |
| BPC(5%)/g-C <sub>3</sub> N <sub>4</sub>  | -0.19924                 | 0.99992        | 0.95289                   | 0.99957        |
| BPC(10%)/g-C <sub>3</sub> N <sub>4</sub> | -0.23514                 | 0.99857        | 1.00177                   | 0.99979        |
| BPC(20%)/g-C <sub>3</sub> N <sub>4</sub> | -0.05697                 | 0.95432        | 0.66843                   | 0.99381        |

Table S2: Langmuir and Freundlich adsorption isotherms fitting parameters for OTC adsorption with g-C<sub>3</sub>N<sub>4</sub> and BPC(X%)/g-C<sub>3</sub>N<sub>4</sub>

| Material                                 | Model fitting parameters |          |                |                  |         |                |
|------------------------------------------|--------------------------|----------|----------------|------------------|---------|----------------|
|                                          | Langmuir model           |          |                | Freundlich model |         |                |
|                                          | Q <sub>m</sub> (mg/g)    | b (L/mg) | R <sup>2</sup> | K (L/g)          | n       | R <sup>2</sup> |
| g-C <sub>3</sub> N <sub>4</sub>          | 3.1573                   | 0.0064   | 0.9808         | 0.0477           | 1.04215 | 0.98796        |
| BPC(1%)/g-C <sub>3</sub> N <sub>4</sub>  | 3.51184                  | 0.08718  | 0.96705        | 0.53707          | 1.53052 | 0.98535        |
| BPC(5%)/g-C <sub>3</sub> N <sub>4</sub>  | 4.56624                  | 0.06485  | 0.96017        | 0.5176           | 1.88487 | 0.99084        |
| BPC(10%)/g-C <sub>3</sub> N <sub>4</sub> | 5.30623                  | 0.06238  | 0.95959        | 0.57263          | 1.84689 | 0.9742         |
| BPC(20%)/g-C <sub>3</sub> N <sub>4</sub> | 6.8294                   | 0.13174  | 0.97489        | 1.41196          | 2.39234 | 0.97248        |

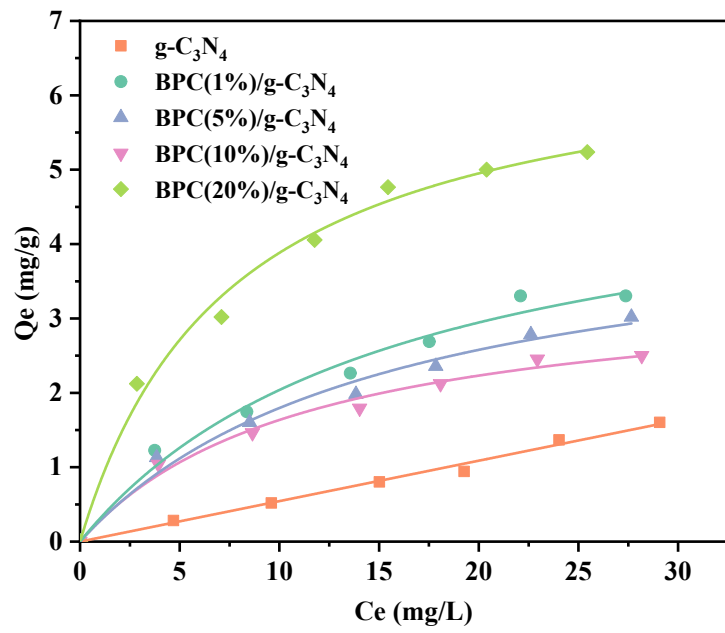

Fig. S1 Linear plots of Langmuir isotherm.

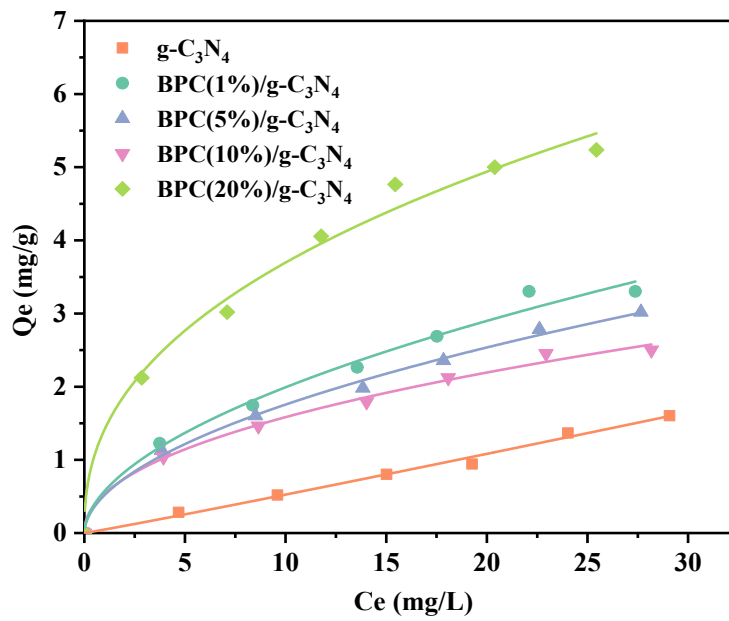

Fig. S2 Linear plots of Freundlich isotherm.
